# Supplementary material for: Spatial distribution of tracers for optical sensing of stream surface flow
Source: Copernicus journal article supplement (doi:10.5194/hess-2020-188), 2020-05-12
Supplement: Supplementary file [file hess-2020-188-AC3-supplement.pdf]

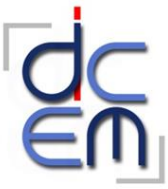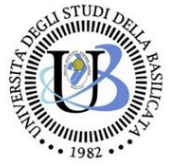

Manuscript [hess-2020-188](#): "*Spatial distribution of tracers for optical sensing of stream surface flow*" by Pizarro et al.

We report a detailed response to each of the comments and suggestions below (text in red).

### **Editor**

Obs. 1: Dear Authors, Your original submission just received some interesting comments from two reviewers. I invite you to provide some preliminary responses so as to suitably feed the discussion step of the journal and possibly receive further comments from these experts.

Ans. 1: We would like to thank the Editor for this suggestion that without a doubt will promote the discussion. We included our responses to the reviewers addressing their suggestions.
